# Supplementary material for: Identification of a small molecule that primes the type I interferon response to cytosolic DNA
Source: PubMed Central journal article supplement (PMC5451460; doi:10.1038/s41598-017-02776-z), 2017-05-31
Supplement: 41598_2017_2776_MOESM1_ESM.pdf [file 41598_2017_2776_MOESM1_ESM.pdf]

1  
2  
3  
4  
5  
6  
7  
8  
9  
10  
11  
12  
13  
14

**SUPPLEMENTARY INFORMATION**

**Identification of a small molecule that primes the type I interferon response  
to cytosolic DNA**

Samira Khiar<sup>1</sup>, Marianne Lucas-Hourani<sup>1</sup>, Sébastien Nisole<sup>2</sup>, Nikaïa Smith<sup>3</sup>, Olivier Helynck<sup>4</sup>, Maryline Bourginé<sup>5</sup>, Claude Ruffié<sup>1</sup>, Jean-Philippe Herbeuval<sup>3</sup>, Hélène Munier-Lehmann<sup>4</sup>, Frédéric Tangy<sup>1</sup>, Pierre-Olivier Vidalain<sup>3</sup>

1 **Supplementary Figure S1. Viability of HEK-293T, A549, MRC5, and Vero cells when**  
2 **treated with ChX79.** Cells were incubated with indicated concentrations of ChX79. After 24  
3 hours of culture, the number of living cells was determined by ATP quantification using the  
4 CellTiter-GLO reagent. Results are expressed as a percentage relative to DMSO-treated cells.  
5 \*\*  $P < 0.01$  corresponds to statistically significant differences between cell types as calculated  
6 by two-way ANOVA and Bonferroni's post hoc test.

7

8 **Supplementary Figure S2. Cellular toxicity of ChX710 and analog compound CID70.**  
9 HEK-293 cells with the ISRE-luciferase reporter gene (STING-37 cell line) were incubated  
10 with increasing concentrations of CID70 **(a)** or ChX710 **(b)**. After 0, 24 and 48 hours of  
11 culture, the number of living cells was determined using the CellTiter-GLO reagent. Results  
12 are expressed as a percentage relative to the initial number of living cells at  $t=0$  hours. \*\*  
13  $P < 0.01$  as calculated by one-way ANOVA with Tukey's post hoc test. **(c)** Human PBMCs  
14 from two independent donors were treated with increasing concentrations of ChX710. After  
15 24 hours of culture, the number of living cells was determined using the CellTiter-GLO  
16 reagent. Results are expressed as a percentage relative to DMSO-treated cells.

17

18 **Supplementary Figure S3. STAT2, but not STAT1, is essential to ISRE activation by**  
19 **IFN- $\beta$ .** **(a)** STAT1, STAT2 or STAT1 and STAT2 were silenced by siRNA transfection in  
20 ISRE-luciferase reporter cells. After 48 hours of cultures, STAT1 and STAT2 expression  
21 levels were determined by western-blot analysis. STAT2 expected size is 113 kDa. \* indicates  
22 bands possibly corresponding to STAT2 degradation intermediates. **(b)** In parallel, cells were  
23 stimulated with recombinant IFN- $\beta$ . After 24 hours of incubation, luciferase induction was  
24 determined. Data represent means  $\pm$  SD of four independent experiments. \*\*  $P < 0.01$

1 corresponds to statistically significant differences as calculated by two-way ANOVA and  
2 Bonferroni's post hoc test.

3

4 **Supplementary Figure S4. Functional validation of siRNA targeting MAVS, STING,**

5 **IRF1 and IRF3. (a)** The silencing of STING, MAVS, IRF1 and IRF3 by siRNA was

6 validated by western-blot **(b)** MAVS was silenced by siRNA transfection in ISRE-luciferase

7 reporter cells. After 48 hours of cultures, cells were left untreated or transfected with ssRNA.

8 After 24 hours of incubation, luciferase induction was determined. **(c)** Same experiment as (b)

9 using STING-specific siRNA and cGAMP stimulation. **(d)** Same experiment as (b) using

10 IRF1 or IRF3-specific siRNA. **(e)** IRF3 was silenced by siRNA transfection in HEK-293T

11 cells. After 48 hours of culture, cells were transfected with pIFN- $\beta$ -Luciferase reporter

12 plasmid alone or ssRNA. After 24 hours of incubation, luciferase induction was determined.

13 **(f)** Schematic model of the signaling pathways induced by ssRNA in HEK-293 cells.

14 Experiments were performed in triplicate and data represent means  $\pm$  SD. \*\*  $P < 0.01$  as

15 calculated by Student's t test.

16

17 **Supplementary Figure S5. Impact of ChX710 on ISRE induction by recombinant IFN- $\alpha$**

18 **or ssRNA. (a)** ISRE-luciferase reporter cells were treated with both recombinant IFN- $\alpha$  and

19 ChX710 at different concentrations. After 24 hours of incubation, luciferase induction was

20 determined. **(b)** Same experiment as in (a) but cells were treated with different concentrations

21 of ChX710 and transfected with ssRNA. Experiments were performed in duplicate and data

22 represent means  $\pm$  SD. \*\*  $P < 0.01$  corresponds to statistically significant differences as

23 calculated by two-way ANOVA and Bonferroni's post hoc test.

24

1 **Supplementary Figure S6. ULK1 degradation is induced by ChX710.** HEK-293 cells  
2 were treated for 24 hours with DMSO alone or increasing concentrations of ChX710. ULK1  
3 expression was determined by western-blot analysis on protein extracts. ULK1 expected size  
4 is 120 kDa. \* indicates bands possibly corresponding to ULK1 degradation intermediates.

Supplementary Figure 1

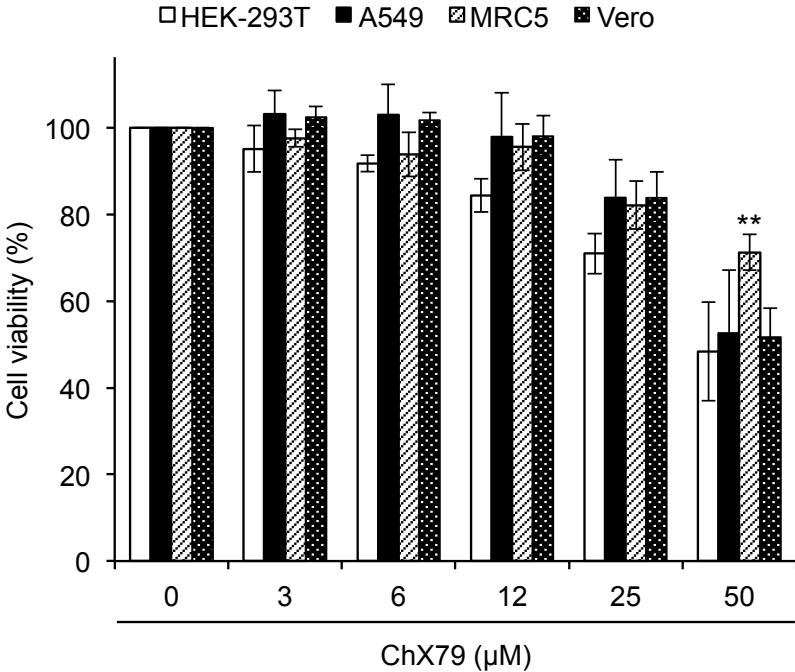

Supplementary  
Figure 2

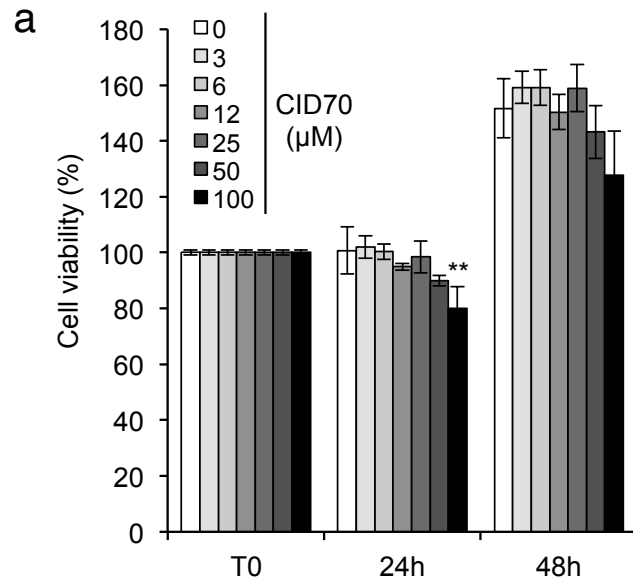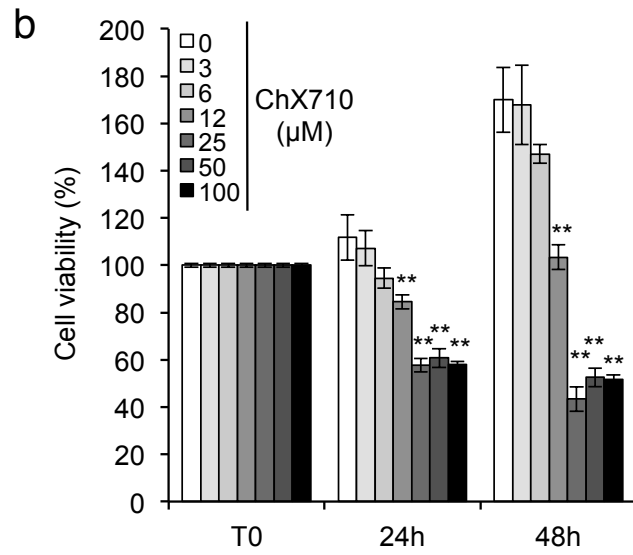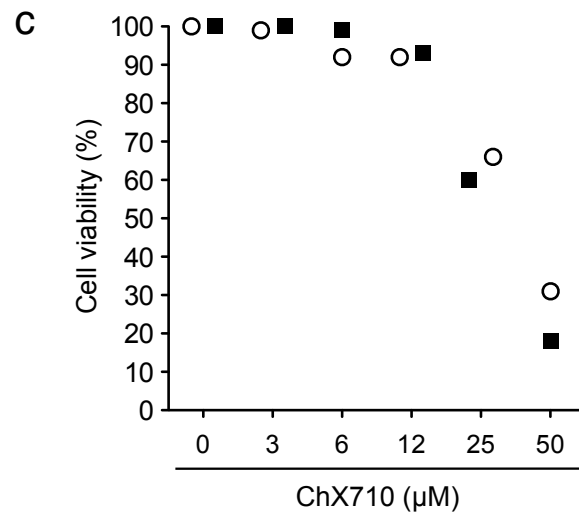

Supplementary Figure 3

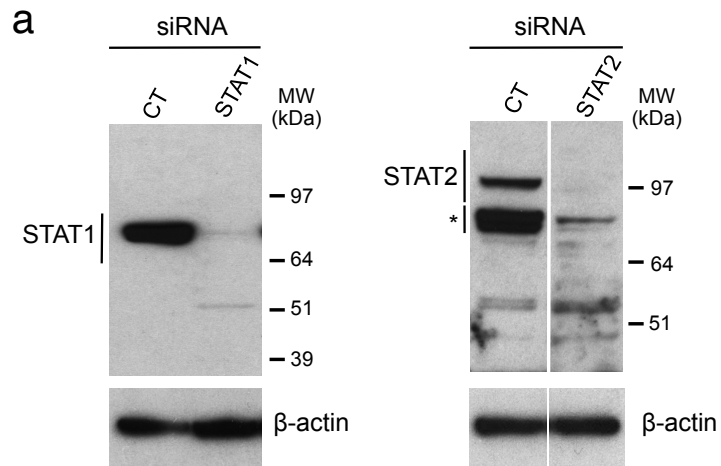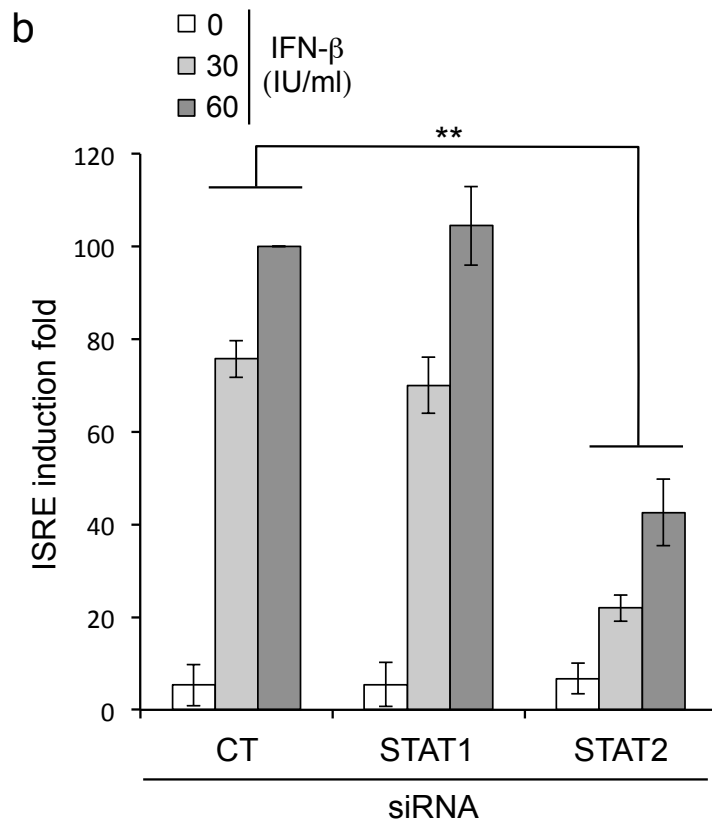

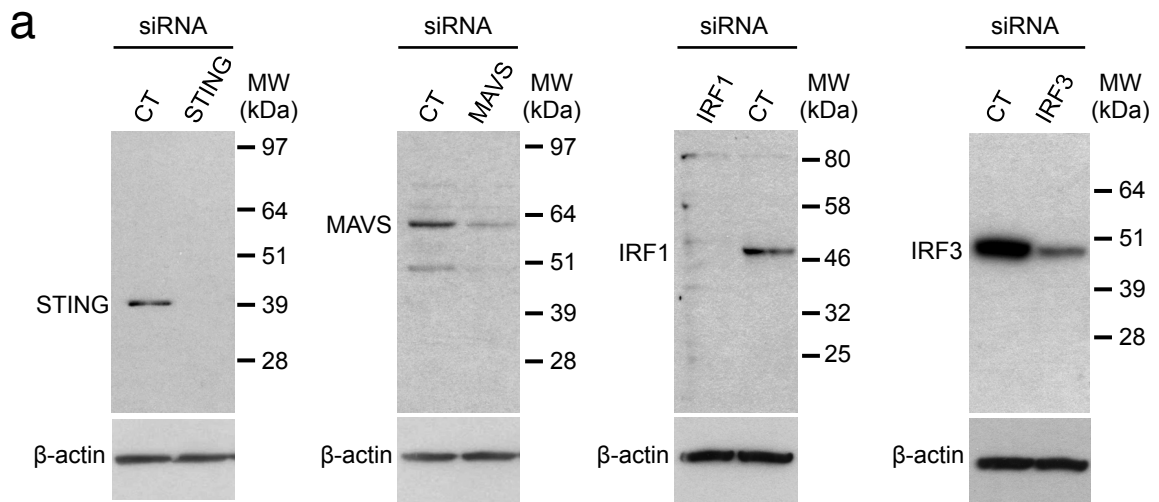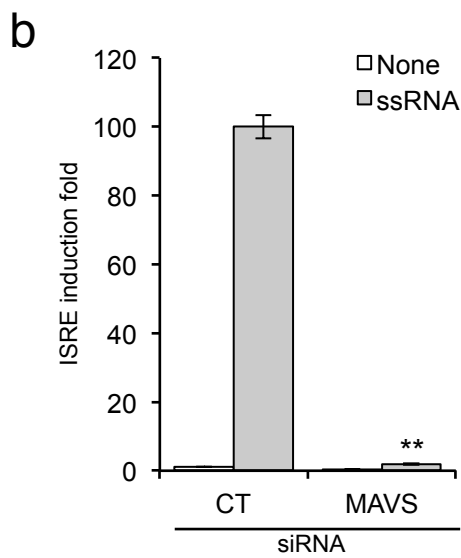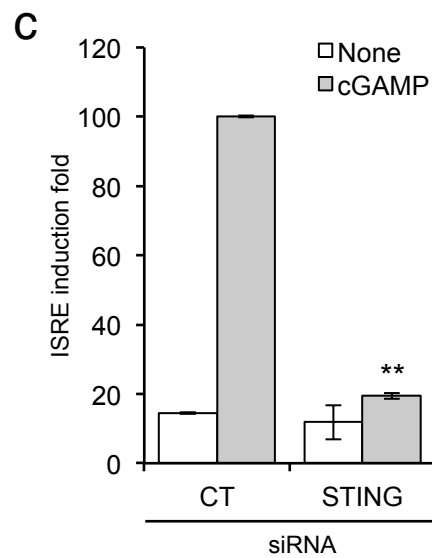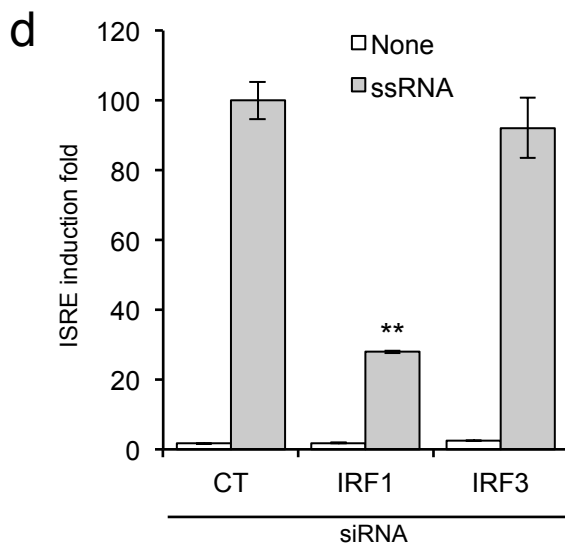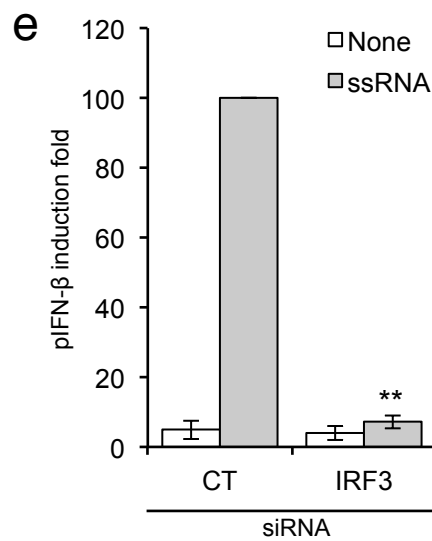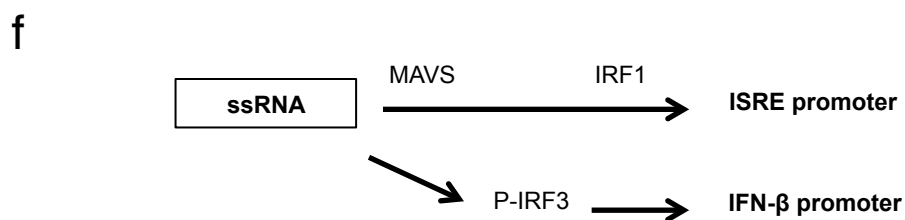



Supplementary Figure 5

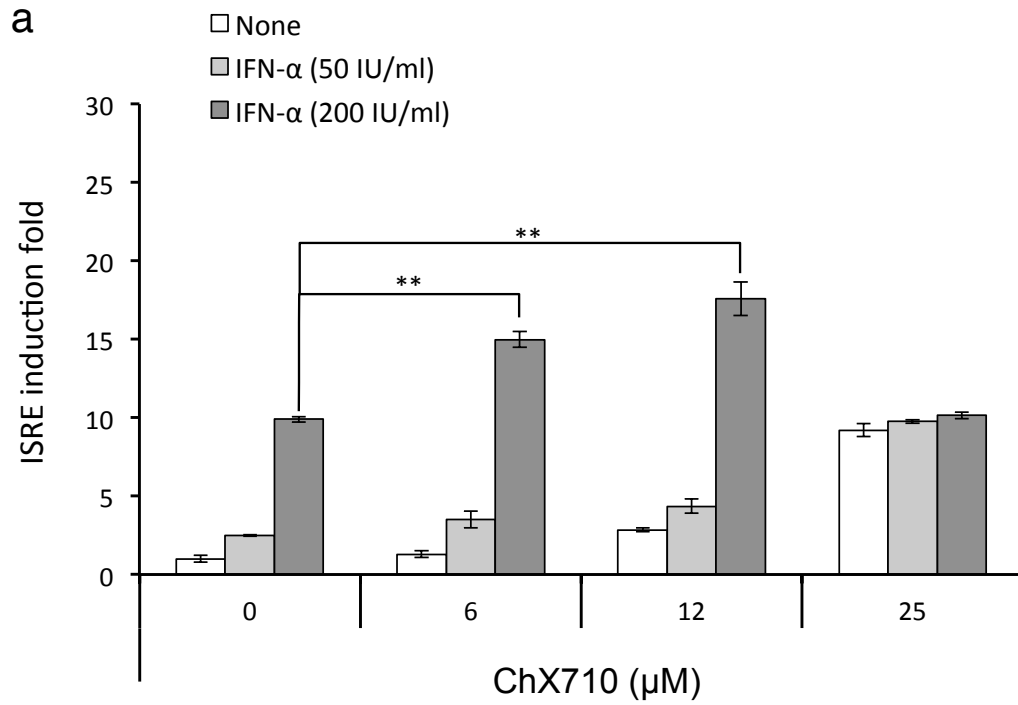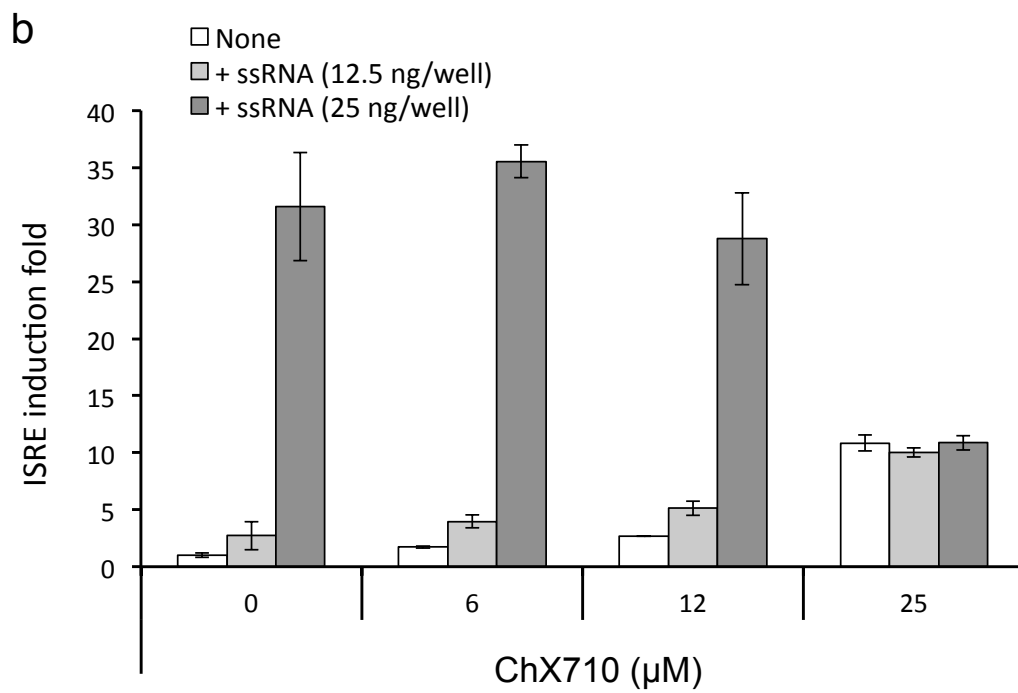

Supplementary Figure 6

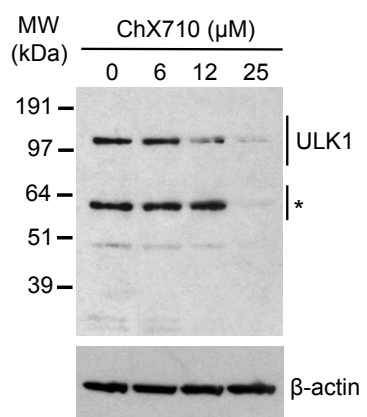

**Supplementary Table S1. Chemical structures of ChX67779 analogs and corresponding ISRE-luciferase induction levels.** Hits from the initial screen are highlighted in yellow color.

Compound concentrations inducing the ISRE-luciferase by >2-folds are in pink color.

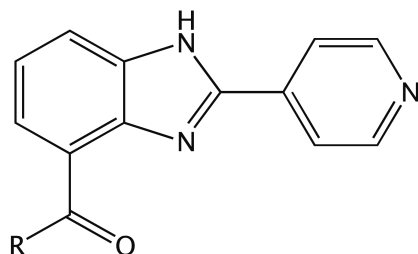

| Compound ID                | R   | ISRE induction fold |            |            |
|----------------------------|-----|---------------------|------------|------------|
|                            |     | 12 $\mu$ M          | 25 $\mu$ M | 50 $\mu$ M |
| <b>ChX67779</b>            |     | 1.6                 | 5.0        | 9.0        |
| <b>ChX0275199</b>          |     | 2.6                 | 3.4        | 3.0        |
| <b>CID11207170 (CID70)</b> | —OH | 1.0                 | 0.9        | 0.8        |
| <b>ChX0306710 (ChX710)</b> |     | 3.8                 | 17.0       | 0.5        |
| <b>ChX0306715</b>          |     | 4.2                 | 9.4        | 1.6        |

|                   |                                                                                     |     |     |      |
|-------------------|-------------------------------------------------------------------------------------|-----|-----|------|
| <b>ChX0306701</b> | 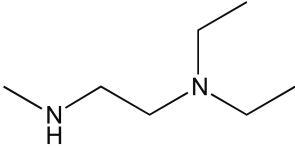   | 1.4 | 2.4 | 10.2 |
| <b>ChX0306718</b> |    | 1.6 | 3.0 | 6.7  |
| <b>ChX0306689</b> |    | 1.8 | 4.6 | 3.2  |
| <b>ChX0306714</b> |   | 1.1 | 1.2 | 7.8  |
| <b>ChX0306709</b> |  | 1.5 | 1.6 | 4.6  |
| <b>ChX0306681</b> |  | 0.9 | 0.9 | 0.9  |
| <b>ChX0306675</b> |  | 1.0 | 1.0 | 0.9  |
| <b>ChX0274736</b> |  | 1.1 | 1.1 | 1.1  |

|                   |                                                                                     |     |     |     |
|-------------------|-------------------------------------------------------------------------------------|-----|-----|-----|
| <b>ChX0275179</b> | 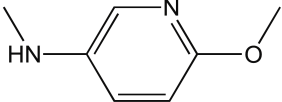   | 1.2 | 1.4 | 1.4 |
| <b>ChX0306698</b> |    | 1.4 | 1.4 | 1.8 |
| <b>ChX0306688</b> |    | 0.8 | 0.9 | 1.0 |
| <b>ChX0275183</b> |   | 1.1 | 1.2 | 1.1 |
| <b>ChX0275193</b> |  | 1.0 | 0.8 | 0.5 |
| <b>ChX0275191</b> |  | 1.2 | 1.4 | 1.3 |
| <b>ChX0275204</b> |  | 0.9 | 0.7 | 0.6 |
| <b>ChX0306682</b> |  | 0.9 | 0.9 | 0.8 |

|                   |                                                                                      |     |     |     |
|-------------------|--------------------------------------------------------------------------------------|-----|-----|-----|
| <b>ChX0306685</b> | 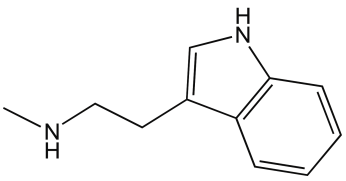    | 0.4 | 0.5 | 0.6 |
| <b>ChX0276286</b> |     | 1.2 | 1.2 | 1.2 |
| <b>ChX0306700</b> |     | 1.1 | 1.3 | 1.1 |
| <b>ChX0306673</b> |    | 0.9 | 0.7 | 0.2 |
| <b>ChX0306702</b> |   | 0.9 | 0.8 | 0.2 |
| <b>ChX0306680</b> |   | 0.9 | 0.9 | 0.9 |
| <b>ChX0306712</b> |   | 1.0 | 0.8 | 0.8 |
| <b>ChX0306716</b> |  | 0.9 | 0.9 | 0.7 |

|                   |                                                                                     |     |     |     |
|-------------------|-------------------------------------------------------------------------------------|-----|-----|-----|
| <b>ChX0306679</b> | 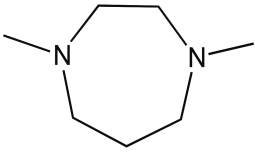   | 1.0 | 0.9 | 0.8 |
| <b>ChX0306684</b> |    | 1.0 | 0.7 | 0.8 |
| <b>ChX0306694</b> |    | 0.7 | 0.9 | 0.9 |
| <b>ChX0306704</b> |   | 1.0 | 0.8 | 0.8 |
| <b>ChX0306705</b> |  | 0.8 | 1.0 | 0.9 |
| <b>ChX0306677</b> |  | 0.9 | 0.7 | 0.8 |
| <b>ChX0306686</b> |  | 1.0 | 1.0 | 0.8 |
| <b>ChX0306692</b> |  | 0.9 | 0.8 | 0.8 |

|                   |                                                                                      |     |     |     |
|-------------------|--------------------------------------------------------------------------------------|-----|-----|-----|
| <b>ChX0306699</b> | 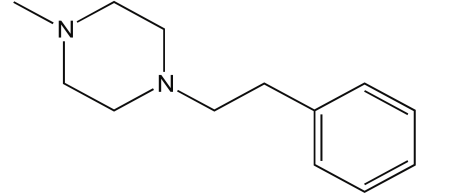   | 1.0 | 1.0 | 0.9 |
| <b>ChX0306703</b> |    | 0.9 | 0.9 | 0.8 |
| <b>ChX0306697</b> |    | 0.8 | 0.8 | 0.8 |
| <b>ChX0306711</b> |   | 0.8 | 0.9 | 0.8 |
| <b>ChX0306719</b> |  | 0.8 | 0.9 | 0.8 |
| <b>ChX0306690</b> |  | 1.1 | 1.2 | 1.0 |
| <b>ChX0306695</b> |  | 1.0 | 1.0 | 0.8 |
| <b>ChX0306706</b> |  | 1.0 | 0.9 | 0.9 |



|                   |                                                                                                                    |     |     |     |
|-------------------|--------------------------------------------------------------------------------------------------------------------|-----|-----|-----|
| <b>ChX0306708</b> | 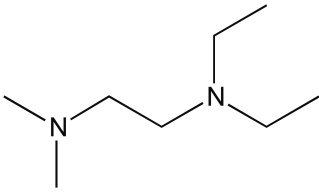<br><chem>CCN(CC)CCN(CC)CC</chem> | 1.0 | 1.0 | 0.8 |
| <b>ChX0306717</b> | <br><chem>CN(C)CCc1ccncc1</chem>  | 0.8 | 1.0 | 0.9 |
| <b>ChX0306676</b> | <br><chem>CN(C)CCc1ccncc1</chem>  | 0.9 | 0.8 | 0.8 |

**Supplementary Table S2. Chemical structures of ChX67779 analogs and corresponding ISRE-luciferase induction levels.**

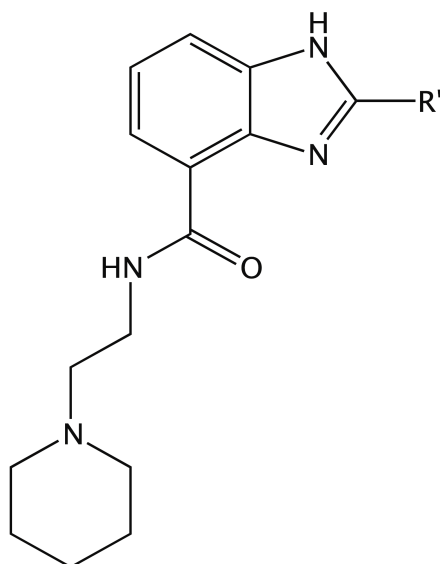

| Compound ID | R'                                                                                  | ISRE induction fold |            |            |
|-------------|-------------------------------------------------------------------------------------|---------------------|------------|------------|
|             |                                                                                     | 12 $\mu$ M          | 25 $\mu$ M | 50 $\mu$ M |
| ChX0275142  | 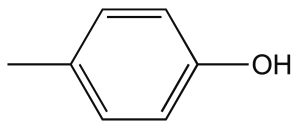 | 1.1                 | 1.0        | 0.9        |
| ChX0275376  |  | 0.9                 | 0.9        | 0.8        |

Supplementary Table S3

| Primer ID            | GenBank ID    | Amplicon size (nt) | Sequence 5' to 3'         |
|----------------------|---------------|--------------------|---------------------------|
| RPL13A-F             | 23521         | 126                | CCTGGAGGAGAAGAGGAAAGAGA   |
| RPL13A-R             |               |                    | TTGAGGACCTCTGTGTATTTGTCAA |
| IFIT1-F              | 3434          | 160                | AGGACAGGAAGCTGAAGGAG      |
| IFIT1-R              |               |                    | AGTGGGTGTTTCCTGCAAGG      |
| IFIT2-F              | 3433          | 84                 | AATAGGACACGCTGTGGCTC      |
| IFIT2-R              |               |                    | AGGCTGGCAAGAATGGAACA      |
| ISG15-F              | 9636          | 117                | CAGCGAACTCATCTTTGCCAG     |
| ISG15-R              |               |                    | GACACCTGGAATTCGTTGCC      |
| IFI6-F               | 2537          | 83                 | GGGTGGAGGCAGGTAAGAAA      |
| IFI6-R               |               |                    | GACGGCCATGAAGGTCAGG       |
| IFI27-F              | 3429          | 106                | ATCAGCAGTGACCAGTGTGG      |
| IFI27-R              |               |                    | GGCCACAACCTCCTCCAATCA     |
| IRF1-F               | 3659          | 105                | TAAGGGGTGTGGCCTTTTTAGA    |
| IRF1-R               |               |                    | AAAGTCAAGTTCAGGCGGGA      |
| PKR-F                | 5610          | 158                | GCGATACATGAGCCCAGAACAG    |
| PKR-R                |               |                    | CTGAGATGATGCCATCCCGTAG    |
| MxA-F                | 4599          | 74                 | AAGCTGATCCGCCTCCACTT      |
| MxA-R                |               |                    | TGCAATGCACCCCTGTATACC     |
| IFN- $\alpha$ 1/13-F | 3439/3447     | 174                | CCAGTTCAGAAAGGCTCCAG      |
| IFN- $\alpha$ 1/13-R |               |                    | TCCTCCTGCATCACACAGGC      |
| IFN- $\alpha$ 4-F    | 3441          | 210                | CCCACAGCCTGGGTAATAGGA     |
| IFN- $\alpha$ 4-R    |               |                    | CAGCAGATGAGTCCTCTGTGC     |
| IFN- $\beta$ -F      | 3456          | 152                | TGCATTACCTGAAGGCCAAGG     |
| IFN- $\beta$ -R      |               |                    | AGCAATTGTCCAGTCCCAGAG     |
| IFN- $\gamma$ -F     | 3458          | 177                | GGCAGCCAACCTAAGCAAGAT     |
| IFN- $\gamma$ -R     |               |                    | CAGGGTCACCTGACACATTCA     |
| IFN- $\lambda$ 1-F   | 282618        | 187                | GGACGCCTTGGAAGAGTCAC      |
| IFN- $\lambda$ 1-R   |               |                    | CTGGTCTAGGACGTCCTCCA      |
| IFN- $\lambda$ 2/3-F | 282616/282617 | 146                | GGGCTGTATCCAGCCTCAG       |
| IFN- $\lambda$ 2/3-R |               |                    | GAGGAGGCGGAAGAGGTTGA      |
